# Supplementary material for: The Synergy of Arbuscular Mycorrhizal Fungi and Exogenous Abscisic Acid Benefits Robinia pseudoacacia L. Growth through Altering the Distribution of Zn and Endogenous Abscisic Acid
Source: MDPI journal article supplement (doi:10.3390/jof7080671), 2021-08-19
Supplement: s1 [file s1]

**Supporting information to:**

**The Synergy of Arbuscular Mycorrhizal Fungi and Exogenous Abscissic Acid Benefits *Robinia pseudoacacia* L. Growth through Altering the Distribution of Zn and Endogenous Abscissic Acid**

Xiao Lou, Xiangyu Zhang, Yu Zhang, Ming Tang \*

\*Correspondence: **Ming Tang**

Email address: tangm@nwsuaf.edu.cn

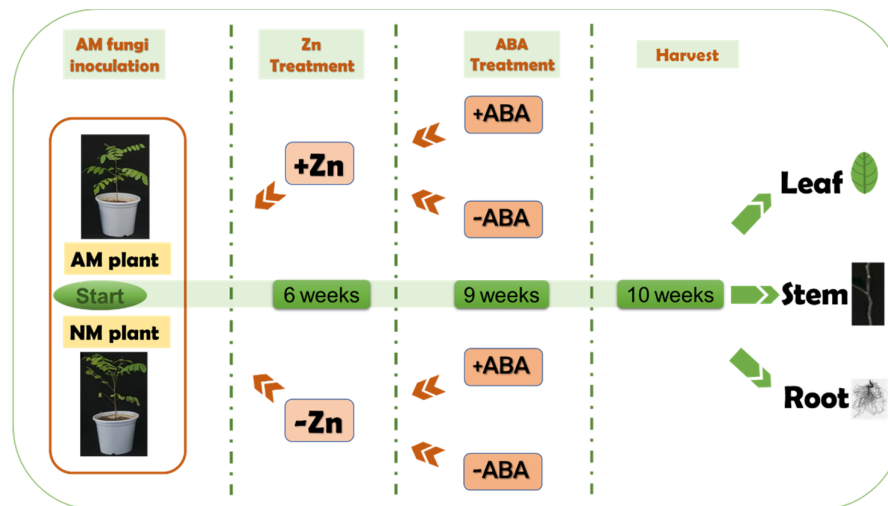

Supplementary Fig. S1 A schematic diagram illustrating the experimental design of this study. AM plant: plants inoculated with AM fungi; NM: plants inoculated without AM fungi; +Zn: 0 mg Zn kg<sup>-1</sup> soil; -Zn: 1000 mg Zn kg<sup>-1</sup> soil; +ABA: 10 μM ABA application; -ABA: 0 μM ABA application.

Table S1 Water-soluble Zn complex contents in the leaves, stems and roots.

| ABA Treatment | Inoculation Treatment | Zinc Treatment | Leaves (μg g <sup>-1</sup> DW) | Stems (μg g <sup>-1</sup> DW) | Roots (μg g <sup>-1</sup> DW) |
|---------------|-----------------------|----------------|--------------------------------|-------------------------------|-------------------------------|
| -ABA          | NM                    | Zn0            | 15.47±1.11a                    | 7.18±0.75a                    | 2.99±0.28a                    |
|               |                       | Zn1000         | 280.96±0.25c                   | 75.28±3.54d                   | 197.88±19.03d                 |
|               | AM                    | Zn0            | 11.07±0.21a                    | 9.74±0.75a                    | 5.90±0.99a                    |
|               |                       | Zn1000         | 128.50±4.44b                   | 28.56±2.37b                   | 97.93±7.66c                   |
| +ABA          | NM                    | Zn0            | 15.17±2.06a                    | 6.74±1.85a                    | 4.31±2.27a                    |
|               |                       | Zn1000         | 305.46±12.34d                  | 55.68±7.78c                   | 190.31±8.87d                  |
|               | AM                    | Zn0            | 11.82±1.09a                    | 11.58±0.72a                   | 6.25±0.86a                    |
|               |                       | Zn1000         | 134.93±12.98b                  | 33.94±5.50b                   | 62.84±1.19b                   |
| Significance  |                       |                |                                |                               |                               |
|               | AMF                   |                | ***                            | ***                           | ***                           |
|               | Zn                    |                | ***                            | ***                           | ***                           |
|               | ABA                   |                | **                             | NS                            | **                            |
|               | AMF*Zn                |                | ***                            | ***                           | ***                           |
|               | AMF*ABA               |                | NS                             | ***                           | *                             |
|               | ABA*Zn                |                | *                              | *                             | **                            |
|               | AMF*Zn*ABA            |                | NS                             | **                            | NS                            |

The data show the means  $\pm$  standard deviations ( $n = 3$ ). The different letters within each column indicate significant differences among the means of the water-soluble water Zn complex contents in the leaves, stems, and roots according to Duncan's test ( $P < 0.05$ ). Significant effects of three-way ANOVA: \*,  $P < 0.05$ ; \*\*,  $P < 0.01$ ; \*\*\*,  $P < 0.001$ ; NS, not significant. -ABA: 0  $\mu\text{M}$  ABA application; +ABA: 10  $\mu\text{M}$  ABA application; AM: AM fungal inoculation; NM: non-AM fungal inoculation; Zn0: 0  $\text{mg kg}^{-1}$  Zn treatment; Zn1000: 1000  $\text{mg kg}^{-1}$  Zn treatment. AMF: AM fungal colonization; Zn: Zn stress; ABA: ABA application.

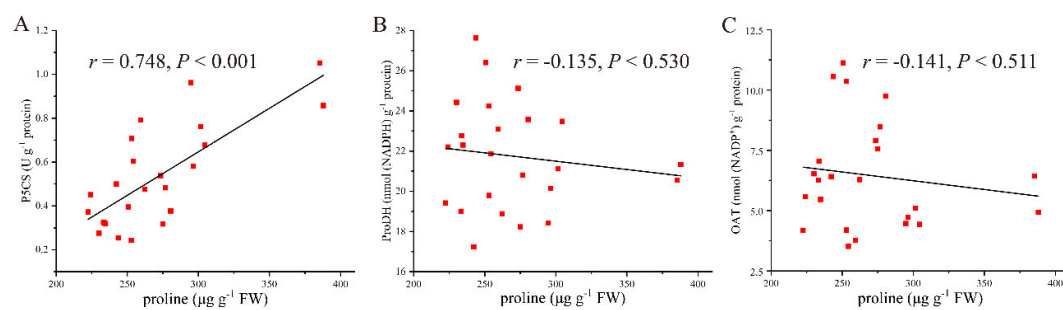

Supplementary Fig. S2 The relationships between proline content and P5CS activity, ProDH activity, OAT activity. Pearson's correlation analysis was made at the levels of 5%.  $n = 24$ .
